# Supplementary material for: Discrete SARS-CoV-2 antibody titers track with functional humoral stability
Source: Springer Nature journal article supplement (doi:10.1038/s41467-021-21336-8), 2021-02-15
Supplement: 41467_2021_21336_MOESM1_ESM.pdf [file 41467_2021_21336_MOESM1_ESM.pdf]

Supplementary Information

**Discrete SARS-CoV-2 antibody titers track with functional humoral stability**

Bartsch et.al

Supplementary Figure 1-4

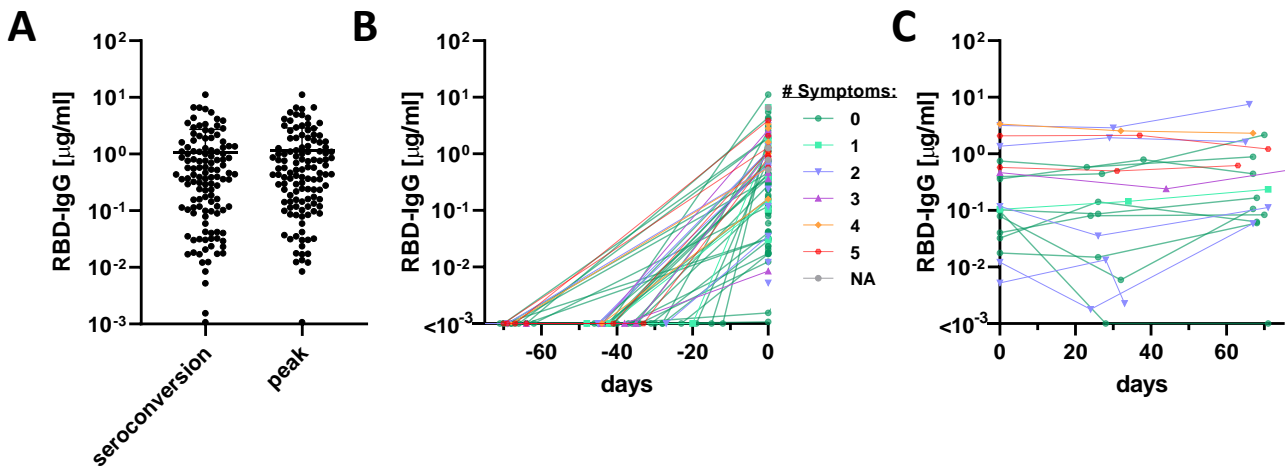

**Supplementary Figure 1.** Antibody profiles broken up over time. (A) The dot plot shows RBD-specific antibody titers at seroconversion and then at maximum observed immunogenicity for the cohort ( $n = 120$ , error bar represents the standard deviation). (B) The line plot shows the timing of antibody increase from last seronegative to first seropositive ( $n=45$ ). (C) The line plot shows the rates of antibody decline over several time points ( $n=19$ ). Source data are provided as a Source Data file.

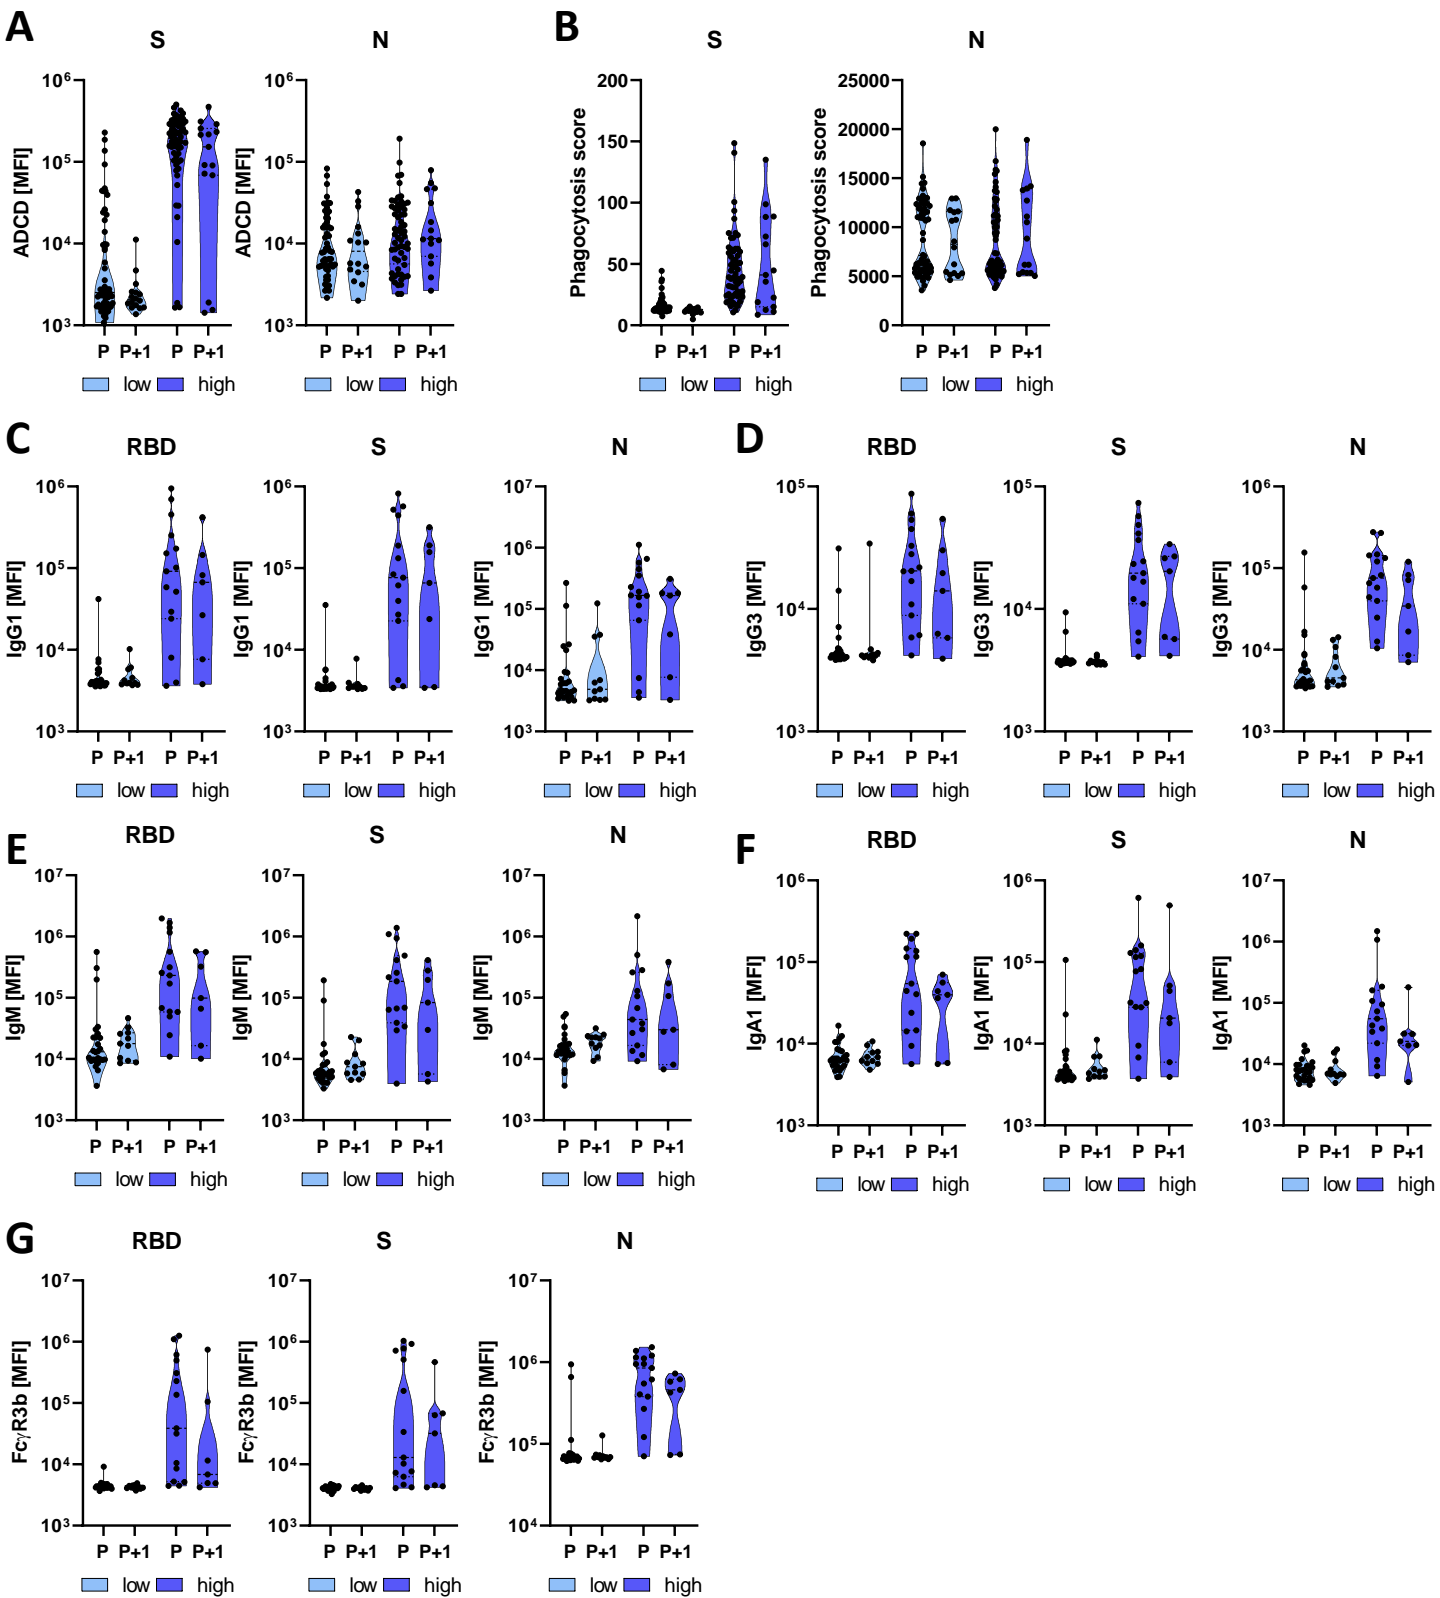

**Supplementary Figure 2.** SARS-CoV-2 specific antibody features in low high titer individuals at maximum observed titers or following (P+1) timepoint. (A-B) S- and N-specific ADCD (A) or ADNP (B) (max:  $n_{\text{low}}=60$ ,  $n_{\text{high}}=60$ ; P+1: ( $n_{\text{low}}=16$ ,  $n_{\text{high}}=15$ )). (C-G) RBD-, S- or N-specific IgG1 (C), IgG3 (D), IgM (E), IgA1 (F) titer, or Fc $\gamma$ R3b binding (G) (max:  $n_{\text{low}}=26$ ,  $n_{\text{high}}=15$ ; P+1: ( $n_{\text{low}}=11$ ,  $n_{\text{high}}=7$ )). Source data are provided as a Source Data file.

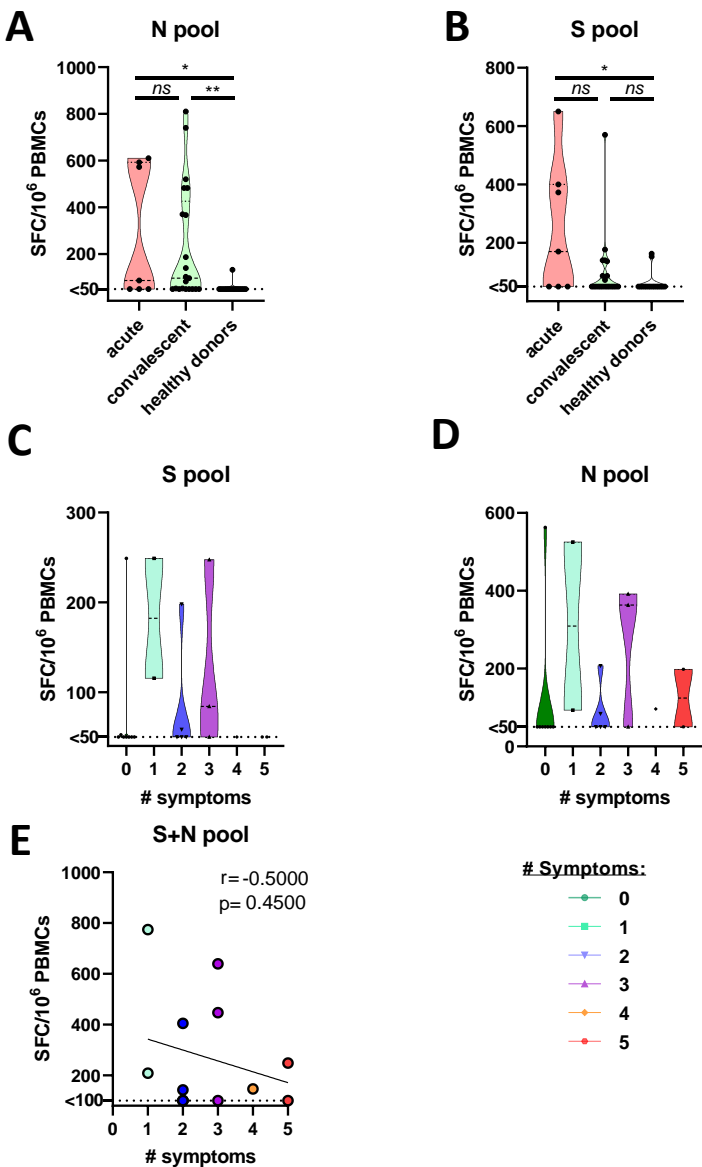

**Supplementary Figure 3.** Robust SARS-CoV-2 specific T cell immune responses in acutely infected and symptomatic convalescent subjects. A) and B) The violin plots show spot forming cells (SFC) of interferon-gamma (IFN $\gamma$ ) secreting T cells after the stimulation with N or S peptide pools across a group of acutely infected (n=7) and symptomatic convalescent (n=21) samples that were run in parallel with the low and high titer asymptomatic/mildly-infected subjects (Figure 4). Pre-pandemic blood donors served as healthy controls (n=16). C) and D) N- and S-specific T cell immune responses in Figure 4F+G were stratified by reported symptoms (values for individuals with multiple symptoms are shown for each symptom individually; LOS= loss of smell, LOT = loss of taste). No statistically significant difference was observed ( $n_0=8$ ,  $n_1=2$ ,  $n_2=5$ ,  $n_3=3$ ,  $n_4=1$ ,  $n_5=2$ ). E) Spearman correlation of S and N pool specific T cells by number of reported symptoms. S and N pool specific SFC/ $10^6$  PBMCs were summed up for this analysis. Statistical differences across groups in A-D were assessed with a non-parametric Kruskal-Wallis test followed by a post-hoc Dunn's correction for multiple testing: in A) \*:p=0.038, \*\*:p=0.002; in B) \*:p=0.036; ns: not significant. Source data are provided as a Source Data file.

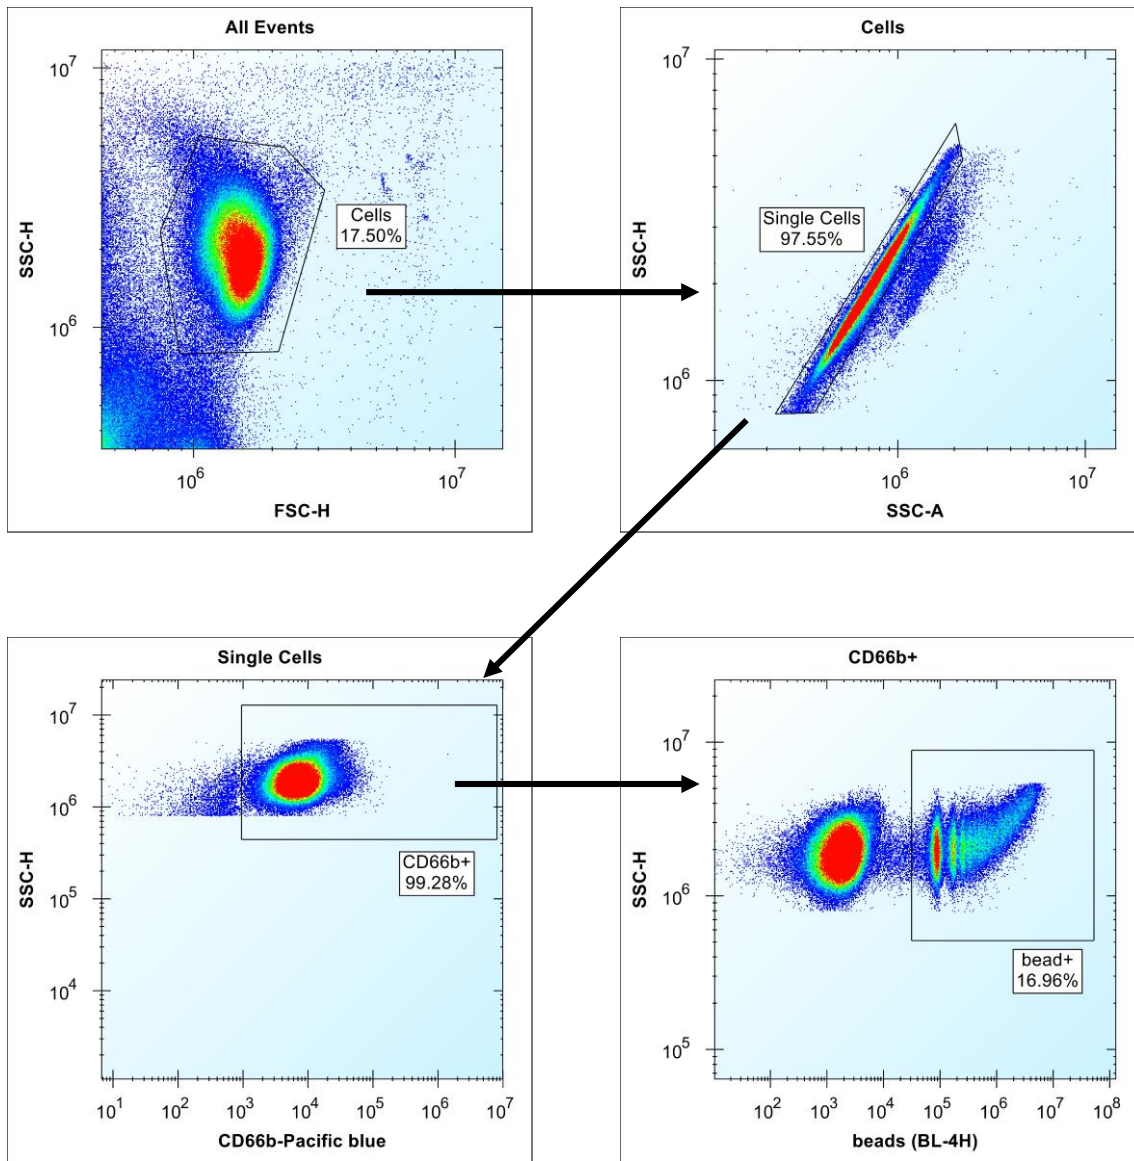

**Supplementary Figure 4.** Gating strategy for Antibody Dependent Neutrophil Phagocytosis (ADNP). The graphs show the gating strategy used to assess neutrophil phagocytic activity presented in Figure 3B+C, Figure 4E and Suppl. Figure 2B.
